# Supplementary material for: Lepidopteran HMG-CoA reductase is a potential selective target for pest control
Source: PeerJ journal article supplement (doi:10.7717/peerj.2881), 2017-01-19
Supplement: Figure_S1.pdf [file Figure_S1.pdf]

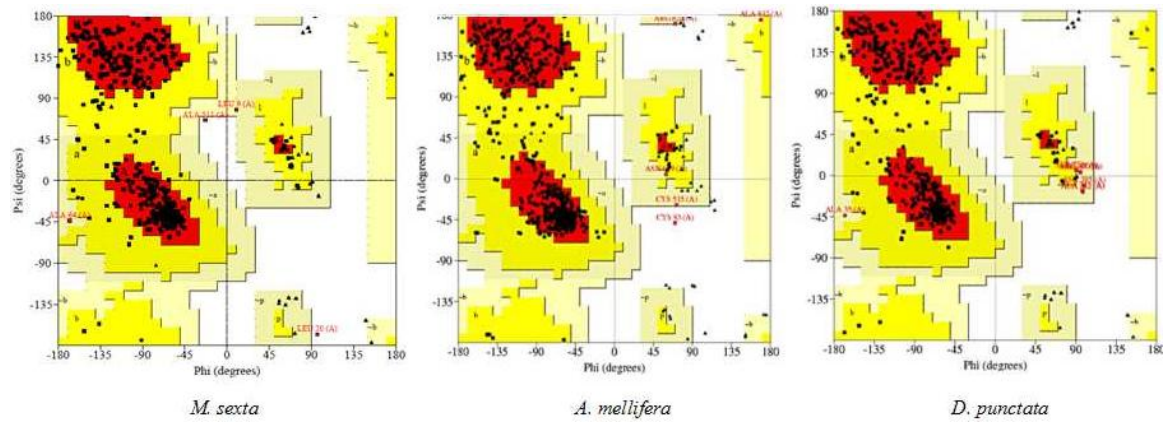

**Figure S1.** Ramachandran plot of the HMGR models of *M. sexta*, *A. mellifera* and *D. punctata*. The most favoured regions are coloured in red. Allowed, generously allowed, and disallowed regions are indicated as yellow, light yellow, and white regions, respectively.
