# Supplementary material for: Lepidopteran HMG-CoA reductase is a potential selective target for pest control
Source: PeerJ journal article supplement (doi:10.7717/peerj.2881), 2017-01-19
Supplement: Figure_S2.pdf [file Figure_S2.pdf]

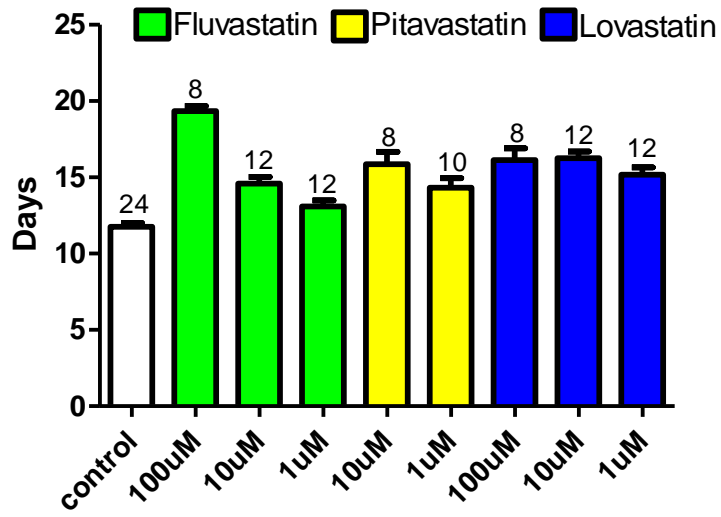

**Figure S2.** The number of days from newly hatched larvae to the 5<sup>th</sup> stadium.
